# Supplementary material for: Combined Soluble Fiber-Mediated Intestinal Microbiota Improve Insulin Sensitivity of Obese Mice
Source: PubMed Central journal article supplement (PMC7071167; doi:10.3390/nu12020351), 2020-01-29
Supplement: nutrients-12-00351-s001.pdf [file nutrients-12-00351-s001.pdf]

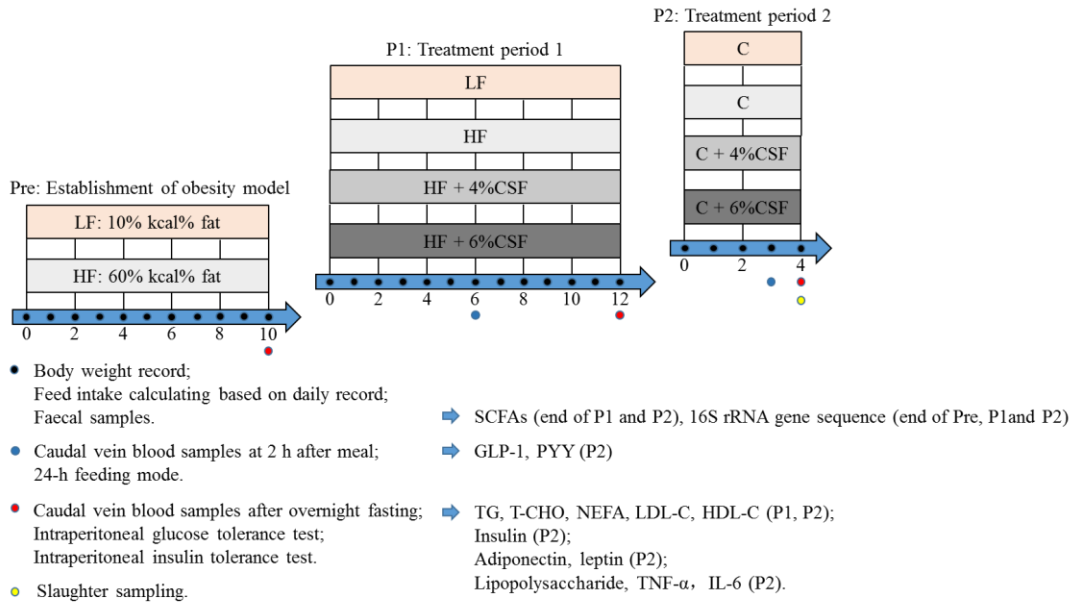

1

2 **Figure S1.** Overview of the study design and sample collection.

3

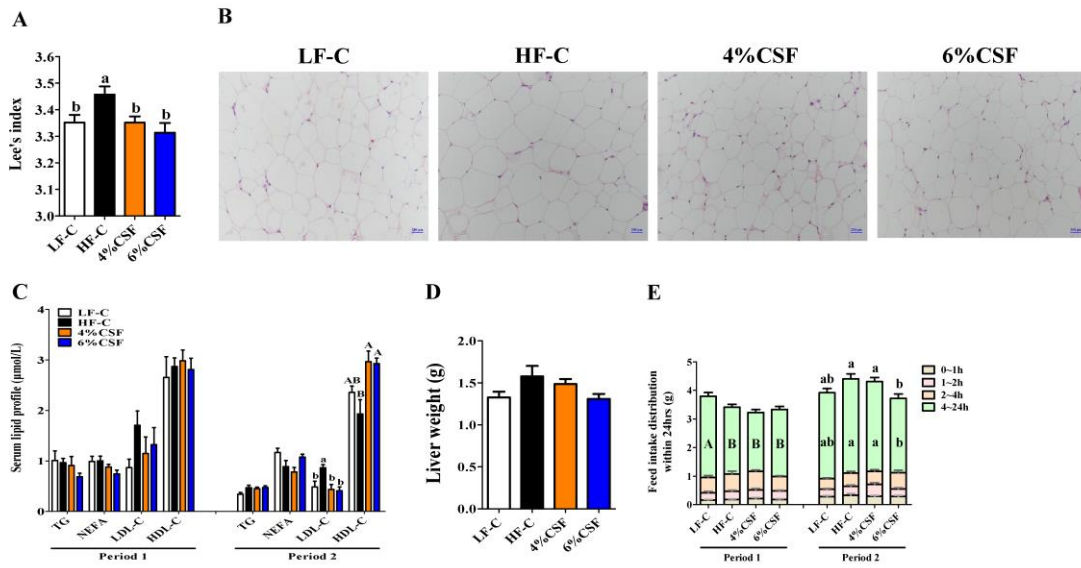

4

5 **Figure S2**, related to figure 1. Effects of CSF on adiposity and appetite of DIO mice within a two-stage  
6 feeding scheme. DIO Mice were fed HFD, or HFD supplemented with 4% or 6%CSF for 12 weeks within  
7 period 1, and then fed chow diet (CD) or CD supplemented with 4% or 6%CSF for 4 weeks within period  
8 2 (n = 7/group). Normal mice (n = 7) were fed LFD during period 1 and CD during period 2. (A) Lee's index  
9 at termination of study. Lee's index was calculated using third power of body weight (g) divided by  
10 nasoanal length (cm). (B) Representative H&E stained images of epididymal WAT at 200x magnification.  
11 Scale bars, 200  $\mu$ m. (C) Serum lipid profile. (D) Liver weight. (E) 24-hour feeding pattern. Data are expressed  
12 as mean  $\pm$  SEM. Statistical significance was assessed by Tukey's test for multiple comparisons. ab means in  
13 the same bar without a common letter differ at  $P < 0.05$ ; AB means in the same bar without a common letter  
14 differ at  $P < 0.01$ .

15

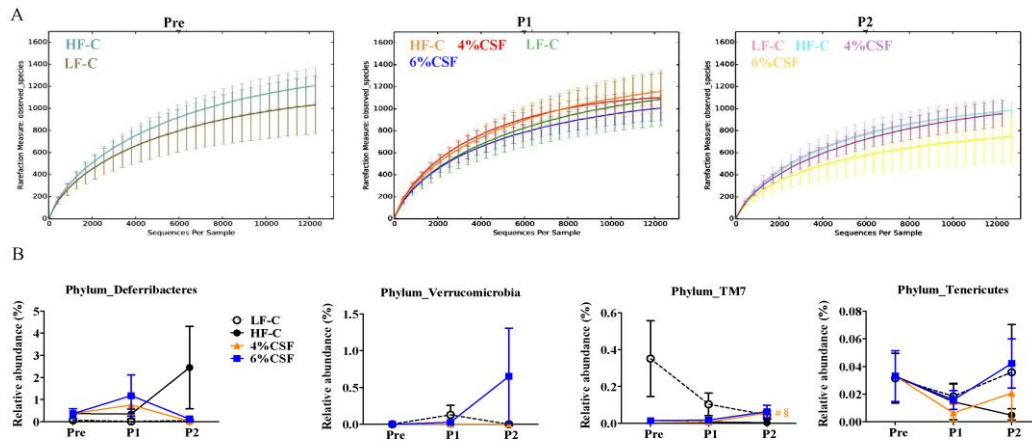

16

17

18

19

20

21

22

23

24

**Figure S3**, related to figure 4. CSF alters the gut microbiota composition. (A) The rarefaction curves of observed species of faeces microbiota over time. (B) The changes of relative abundance of Defferribacteres, Verrucomicrobia, TM7 and Tenericutes. Data are expressed as mean  $\pm$  SEM. Statistical significance was assessed by unpaired Student t test. & & P < 0.05, 0.01, respectively, compared with the LF-C group. §, P < 0.05, compared with the treatment period 1. The orange and blue statistical symbols represent the statistical analysis of 4% CSF or 6% CSF groups, respectively, with other groups or the same group at different time points.

25 **Table S1.** The composition of the purified diets used in this study

| Experimental stage         | Treatment period 1 |               |         |         | Treatment period 2 |         |         |         |
|----------------------------|--------------------|---------------|---------|---------|--------------------|---------|---------|---------|
| Group                      | LF-C               | HF-C          | 4%CSF   | 6%CSF   | LF-C               | HF-C    | 4%CSF   | 6%CSF   |
| Basal diet                 | TP23302            | TP23300       |         |         | LAD3001M           |         |         |         |
|                            | low fat            | high fat diet |         |         | chow diet          |         |         |         |
| kcal/gm                    | 3.60               | 5.00          |         |         | 3.60               |         |         |         |
| Protein, kcal%             | 19.00              | 19.40         |         |         | 14.10              |         |         |         |
| Carbohydrate, kcal%        | 71.00              | 20.60         |         |         | 75.90              |         |         |         |
| Fat, kcal%                 | 10.00              | 60.00         |         |         | 10.00              |         |         |         |
| <b>Ingredient</b>          |                    |               |         |         |                    |         |         |         |
| Casein, gm                 | 191.00             | 267.00        | 267.00  | 267.00  | 140.00             | 140.00  | 140.00  | 140.00  |
| Corn starch, gm            | 497.00             | 0.00          | 0.00    | 0.00    | 465.69             | 465.69  | 465.69  | 465.69  |
| Maltodextrin, gm           | 112.00             | 157.00        | 157.00  | 157.00  | 145.00             | 145.00  | 145.00  | 145.00  |
| Sucrose, gm                | 64.00              | 89.00         | 89.00   | 89.00   | 100.00             | 100.00  | 100.00  | 100.00  |
| Fat, gm                    | 40.00              | 334.00        | 334.00  | 334.00  | 40.00              | 40.00   | 40.00   | 40.00   |
| Cellulose, gm              | 48.00              | 67.00         | 27.00   | 7.00    | 60.00              | 60.00   | 20.00   | 0.00    |
| CSF, gm                    | 0.00               | 0.00          | 40.00   | 60.00   | 0.00               | 0.00    | 40.00   | 60.00   |
| Vitamin Mix, V1010 and     | 43.00              | 79.00         | 79.00   | 79.00   | 45.00              | 45.00   | 45.00   | 45.00   |
| L-Cystine, gm              | 3.00               | 4.00          | 4.00    | 4.00    | 1.80               | 1.80    | 1.80    | 1.80    |
| Choline Bitartrate, gm     | 2.00               | 3.00          | 3.00    | 3.00    | 2.50               | 2.50    | 2.50    | 2.50    |
| TBHQ, gm                   | 0.01               | 0.07          | 0.07    | 0.07    | 0.01               | 0.01    | 0.01    | 0.01    |
| Total, gm                  | 1000.01            | 1000.07       | 1000.07 | 1000.07 | 1000.00            | 1000.00 | 1000.00 | 1000.00 |
| <b>Laboratory analysis</b> |                    |               |         |         |                    |         |         |         |
| Gross energy, kcal/gm      | 4.23               | 5.87          | 5.83    | 5.81    | 4.39               | 4.39    | 4.27    | 4.21    |

27 **Table S2.** Key Resource Table-supplemental oligonucleotides.

| OLIGONUCLEOTIDES                                                         | SOURCE                                        | Pubmed ID      |
|--------------------------------------------------------------------------|-----------------------------------------------|----------------|
| 36B4: 5'-TCCAGGCTTTGGGCATCA-3'<br>and 5'-CTTTATTCAGCTGCACATCACTCAGA-3'   | Wuhan AuGCT DNA-SYN<br>Biotechnology Co., Ltd | XR_002380971.2 |
| ZO-1: 5'-ACCCGAAACTGATGCTGTGGATAG-3'<br>and 5'-AAATGGCCGGCAGAACTTGTGA-3' | Wuhan AuGCT DNA-SYN<br>Biotechnology Co., Ltd | BC138028.1     |
| ZO-2: 5'-GTTTGGCCCATAGCAGATA-3'<br>and 5'-TCCGGGTTGAAGAAAATCAC-3'        | Wuhan AuGCT DNA-SYN<br>Biotechnology Co., Ltd | AF113005.1     |
| Occludin: 5'-ATGTCCGGCCGATGCTCTC-3'<br>and 5'-TTTGGCTGCTCTGGGTCTGTAT-3'  | Wuhan AuGCT DNA-SYN<br>Biotechnology Co., Ltd | U49185.1       |
| Claudin-1: 5'-ATTTACTCCTATGCCGGCGA-3'<br>and 5'-ACCTCATCGTCTTCCAAGCA-3'  | Wuhan AuGCT DNA-SYN<br>Biotechnology Co., Ltd | NM_021101.5    |
| Claudin-2: 5'-GTCATCGCCATCAGAAGAT-3'<br>and 5'-ACTGTTGGACAGGGAACCAG-3'   | Wuhan AuGCT DNA-SYN<br>Biotechnology Co., Ltd | NM_016675.4    |
| Claudin-3: 5'-GAGATGGGAGCTGGGTTGTA-3'<br>and 5'-ACGTAGTCCTTGCGGTCGTA-3'  | Wuhan AuGCT DNA-SYN<br>Biotechnology Co., Ltd | NM_009902.4    |
| Claudin-15: 5'-GCCTCTTCTAGGCATGGTG-3'<br>and 5'-TCCAGCATAACAGTGGGTTGA-3' | Wuhan AuGCT DNA-SYN<br>Biotechnology Co., Ltd | NM_021719.4    |
| Muc-1: 5'-CTGTTACCACCACCATGAC-3'<br>and 5'-CTTGAAGGGCAAGAAAACC-3'        | Wuhan AuGCT DNA-SYN<br>Biotechnology Co., Ltd | NM_013605.2    |
| Muc-2: 5'-CAACAAGCTTCACCACAATCTC-3'<br>and 5'-CAGACAAAAGCAGCAAGGTA-3'    | Wuhan AuGCT DNA-SYN<br>Biotechnology Co., Ltd | NM_023566.3    |
| E-cadherin: 5'-ATCCTCGCCCTGCTGATT-3'<br>and 5'-ACCACCGTTCTCCTCCGTA-3'    | Wuhan AuGCT DNA-SYN<br>Biotechnology Co., Ltd | BC098501.1     |
| 16S rRNA: 5'-AGAGTTTGATCCTGGCTCAG-3'<br>and 5'-CTGCTGCCTCCCGTAGGAGT-3'   | Wuhan AuGCT DNA-SYN<br>Biotechnology Co., Ltd | AP019773.1     |

29 **Table S3.** Key Resource Table-critical commercial assays.

| Critical Commercial Assays                                              |                                                            |                 |
|-------------------------------------------------------------------------|------------------------------------------------------------|-----------------|
| Triglyceride assay kit                                                  | Nanjing Jiancheng Bioengineering Institute, Nanjing, China | Cat.# A110-1-1  |
| Nonesterified Free fatty acids assay kit                                | Nanjing Jiancheng Bioengineering Institute, Nanjing, China | Cat.# A042-2-1  |
| Low-density lipoprotein cholesterol assay kit                           | Nanjing Jiancheng Bioengineering Institute, Nanjing, China | Cat.# A113-1-1  |
| High-density lipoprotein cholesterol assay kit                          | Nanjing Jiancheng Bioengineering Institute, Nanjing, China | Cat.# A112-1-1  |
| Mouse Insulin(INS) ELISA Kit                                            | Jiyinmei Biotechnology Co. Ltd., Wuhan, China              | Cat.# JYM0351MO |
| Mouse Peptide YY(PYY) ELISA Kit                                         | Jiyinmei Biotechnology Co. Ltd., Wuhan, China              | Cat.# JYM0764MO |
| Mouse Glucagon-like peptide 1 (GLP-1) ELISA Kit                         | Jiyinmei Biotechnology Co. Ltd., Wuhan, China              | Cat.# JYM0515MO |
| Mouse Lipopolysaccharide (LPS) ELISA Kit                                | Jiyinmei Biotechnology co., Ltd., Wuhan, China             | Cat.# JYM0588MO |
| Mouse Leptin(LEP) ELISA Kit                                             | Jiyinmei Biotechnology co., Ltd., Wuhan, China             | Cat.# JYM0015MO |
| Mouse Adiponectin(ADP) ELISA Kit                                        | Jiyinmei Biotechnology co., Ltd., Wuhan, China             | Cat.# JYM0454MO |
| MU30030 Mouse Tumor necrosis factor $\alpha$ (TNF- $\alpha$ ) ELISA Kit | Bioswamp Biotechnology co., Ltd., Wuhan, China             | Cat.# MU30030   |
| Mouse Interleukin(IL-6) ELISA Kit                                       | Bioswamp Biotechnology co., Ltd., Wuhan, China             | Cat.# MU30044   |
| BrdU                                                                    | Servicebio, Wuhan, China                                   | Cat.# WB8010    |
| organic acids                                                           | Fluka, Buchs, Switzerland                                  | -               |
| QIAamp Fast DNA Stool Mini Kit                                          | Qiagen, Hilden, Germany                                    | Cat.# 51604     |
| QuantiFast SYBR Green PCR kit                                           | Qiagen, Hilden, Germany                                    | Cat.# 204054    |
| Hieff qPCR SYBR Green Master Mix                                        | Yeasen Biotechnology Co., Ltd., Shanghai, China            | Cat.# 11202ES08 |
| TRIzol                                                                  | Invitrogen, Carlsbad, CA, USA                              | -               |
